# Supplementary material for: Transcriptional profiling of Anopheles gambiae mosquitoes for adult age estimation
Source: PubMed Central journal article supplement (PMC2998705; doi:10.1111/j.1365-2583.2010.01034.x), 2010-08-01

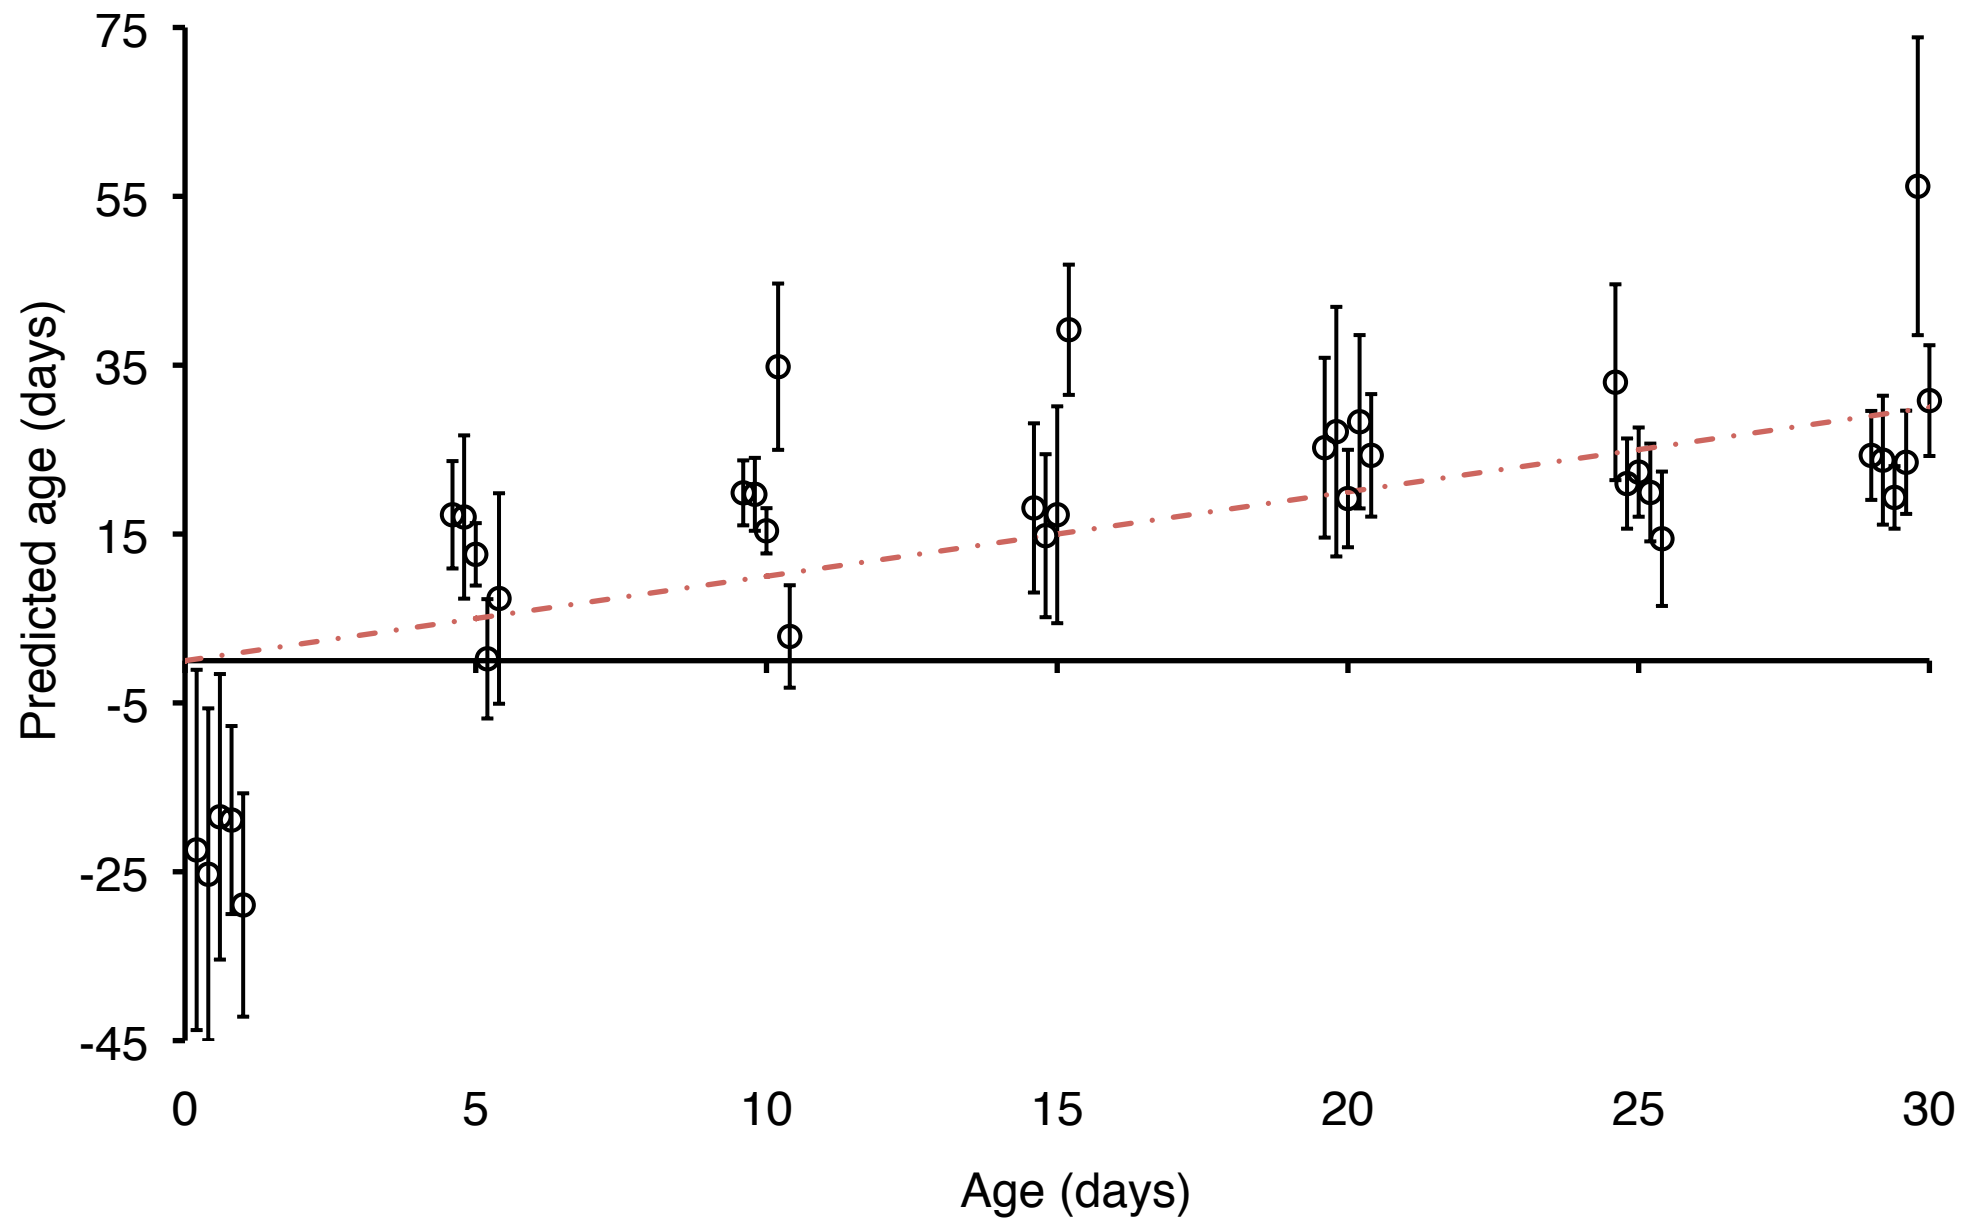

Supplement: imb0019-0745-SD4.pdf [file imb0019-0745-SD4.pdf]
